# Supplementary material for: A brain-wide form of presynaptic active zone plasticity orchestrates resilience to brain aging in Drosophila
Source: PubMed Central journal article supplement (PMC9721493; doi:10.1371/journal.pbio.3001730), 2022-12-05
Supplement: pbio.3001730.s016.pdf [file pbio.3001730.s016.pdf]

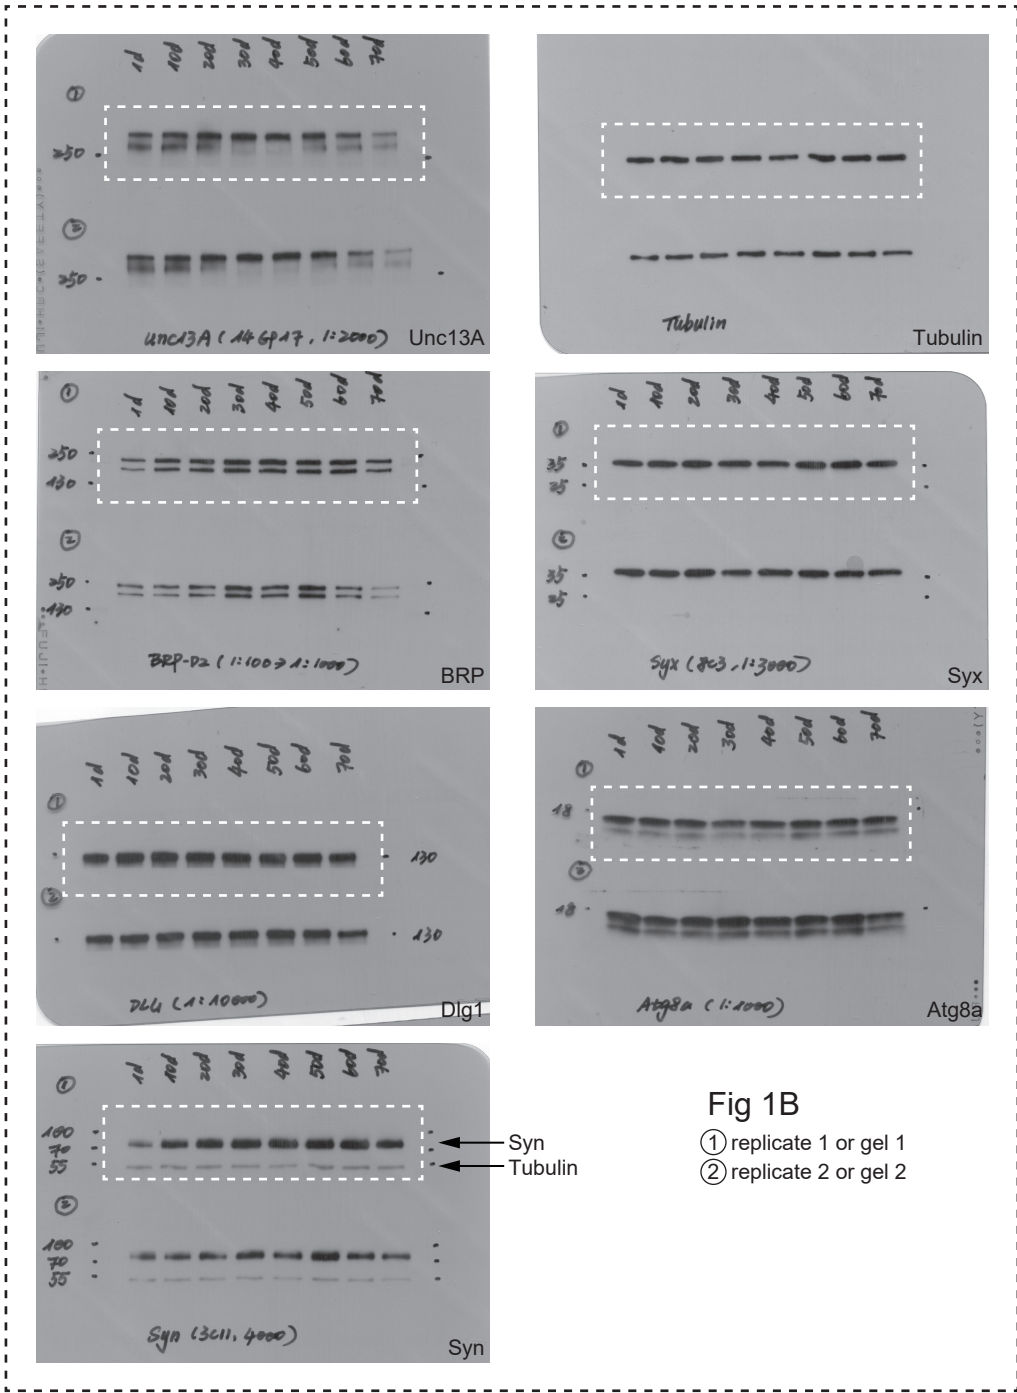

**Fig 1B**  
 ① replicate 1 or gel 1  
 ② replicate 2 or gel 2

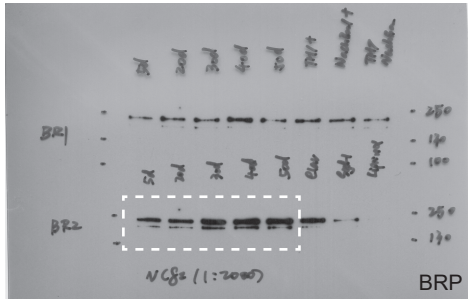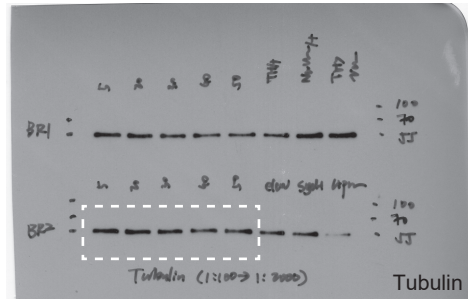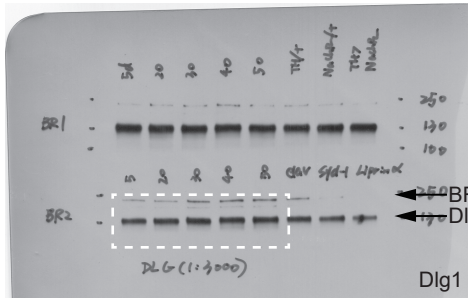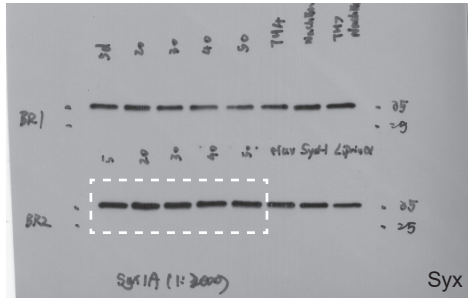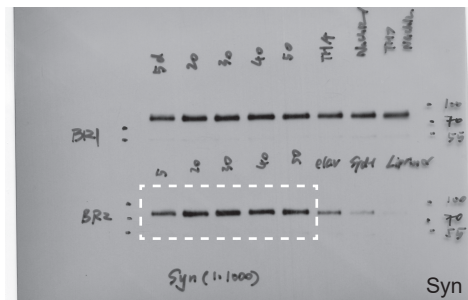

S1A Fig

BR1: replicate 1 or gel 1  
 BR2: replicate 2 or gel 2
